# Supplementary material for: Metal–organic framework-combustion: a new, cost-effective and one-pot technique to produce a porous Co3V2O8 microsphere anode for high energy lithium ion batteries
Source: Royal Society of Chemistry journal article supplement (doi:10.1039/c6ta05919h), 2016-01-01
Supplement: c6ta05919h1.pdf [file c6ta05919h1.pdf]

### Supplementary Information

#### **Metal-organic framework-combustion: a new, cost-effective and one-pot technique to a porous $\text{Co}_3\text{V}_2\text{O}_8$ microspheres anode for high energy Lithium-ion batteries†**

*Balaji Sambandam‡, Vaiyapuri Soundharrajan‡, Vinod Mathew, Jinju Song, Sungjin Kim, Jeonggeun Jo, Duong Pham Tung, Seokhun Kim and Jaekook Kim\**

Department of Materials Science and Engineering, Chonnam National University,  
Gwangju 500-757, South Korea

E-mail: jaekook@chonnam.ac.kr

‡ These authors contributed equally

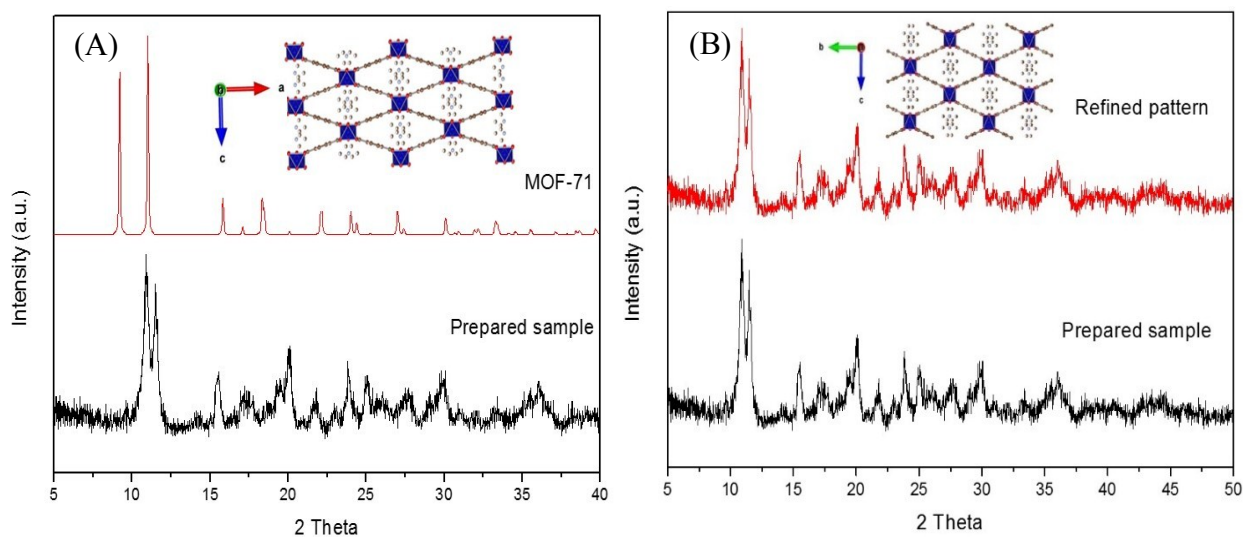

**Fig. S1.** (A) PXRD comparison between MOF-71 (simulated, top) and Co-V-MOF intermediate (below), (B) PXRD patterns before (below) and after refinement (top) for Co-V-MOF intermediate with respect to MOF-71 simulated pattern.

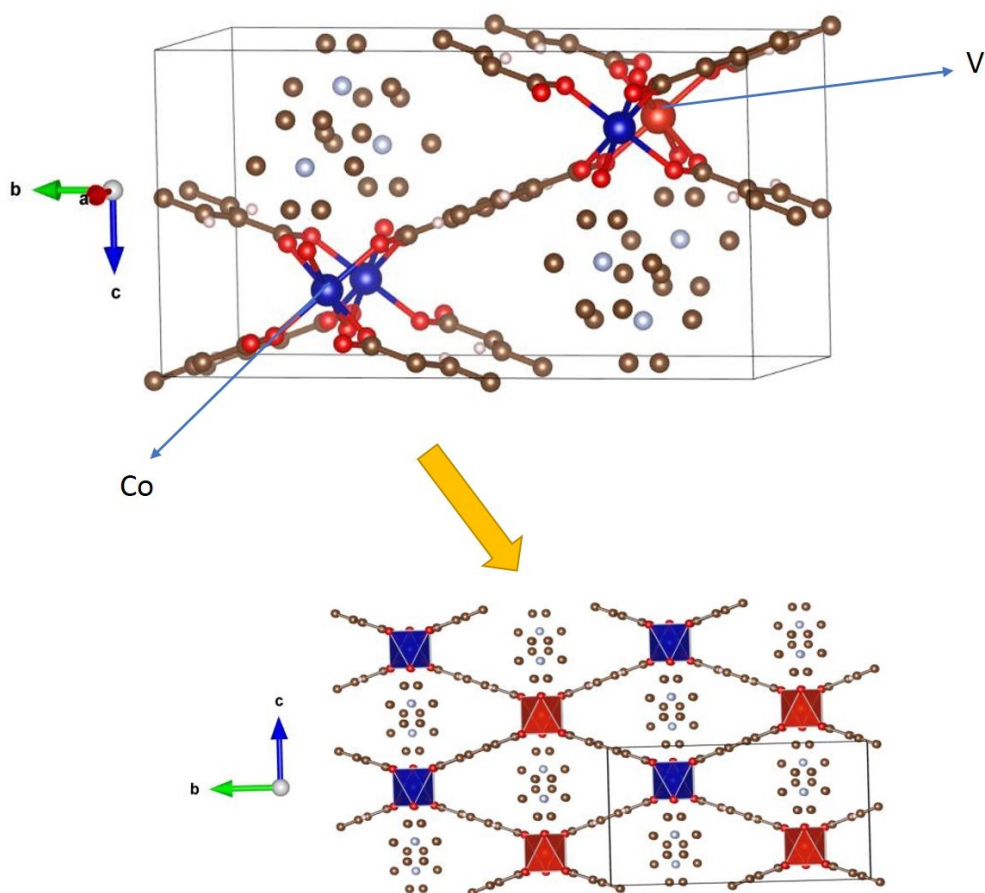

**Fig. S2.** Unit cell pattern of Co-V-MOF by replacing one Co atom with V atom in the Co-MOF-71 network (top), corresponding polyhedral 2D pattern (bottom).

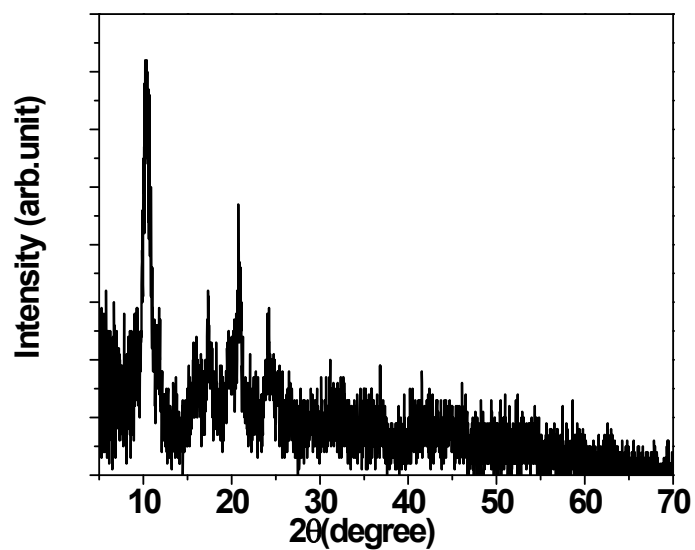

**Fig. S3.** PXRD pattern for Co-V-MOF derived after the solvothermal reaction at 180 °C for 12 h.

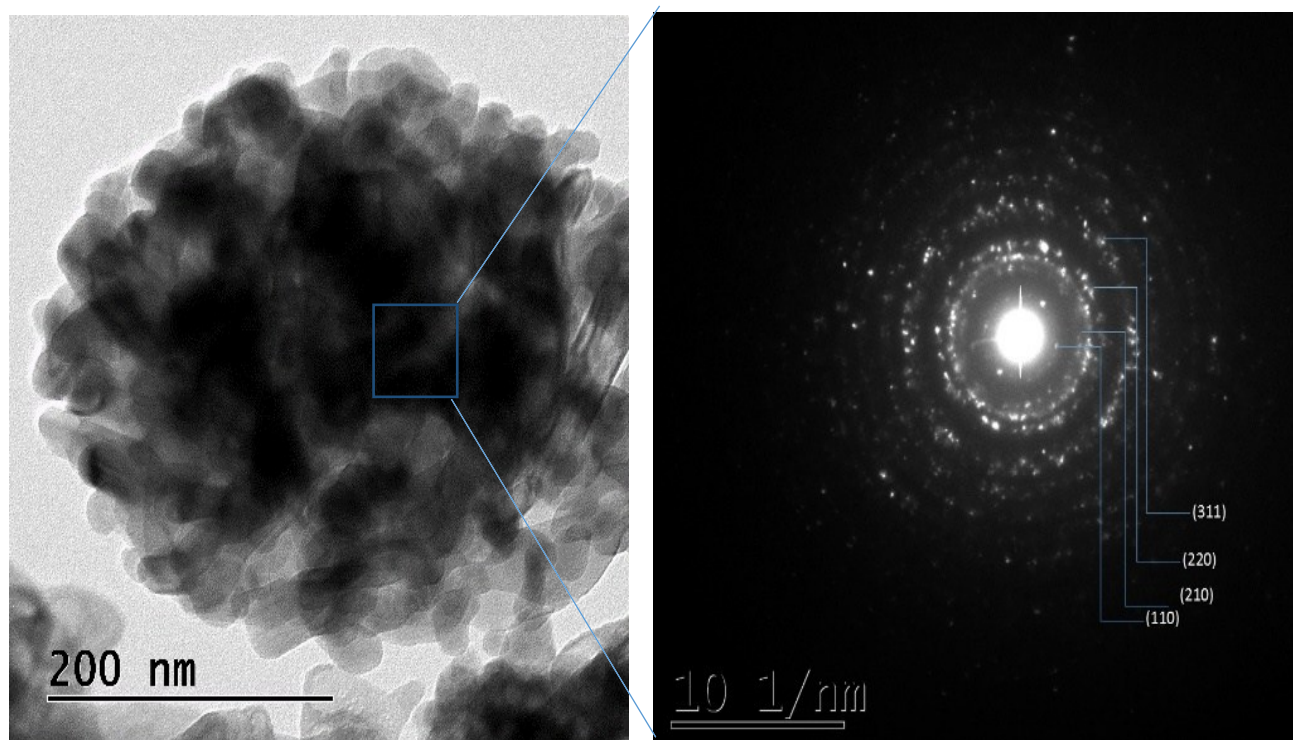

**Fig. S4.** High resolution TEM image (left) and corresponding SAED pattern (right).

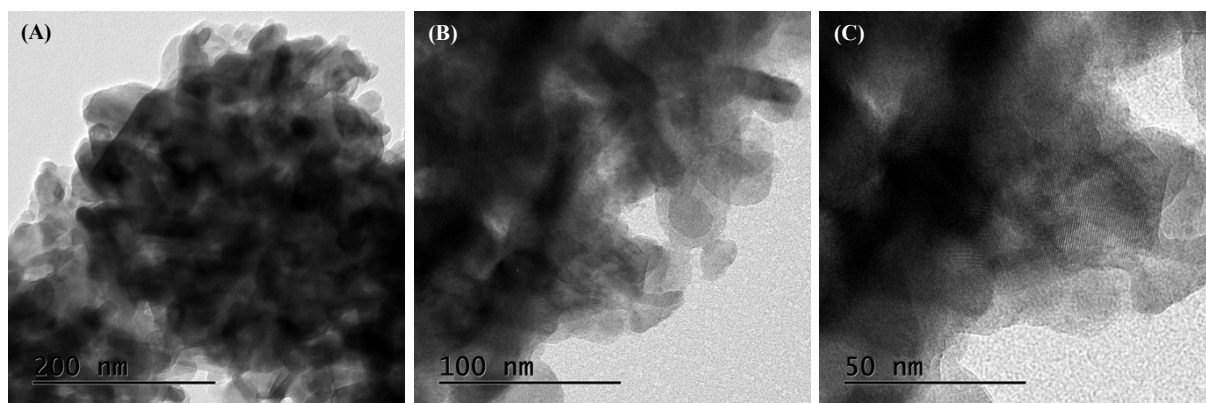

**Fig. S5.** FE-TEM images of  $\text{Co}_3\text{V}_2\text{O}_8$  microspheres (A) low magnification, (B) and (C) high magnifications. Void spaces are clearly seen in the highly magnified images.

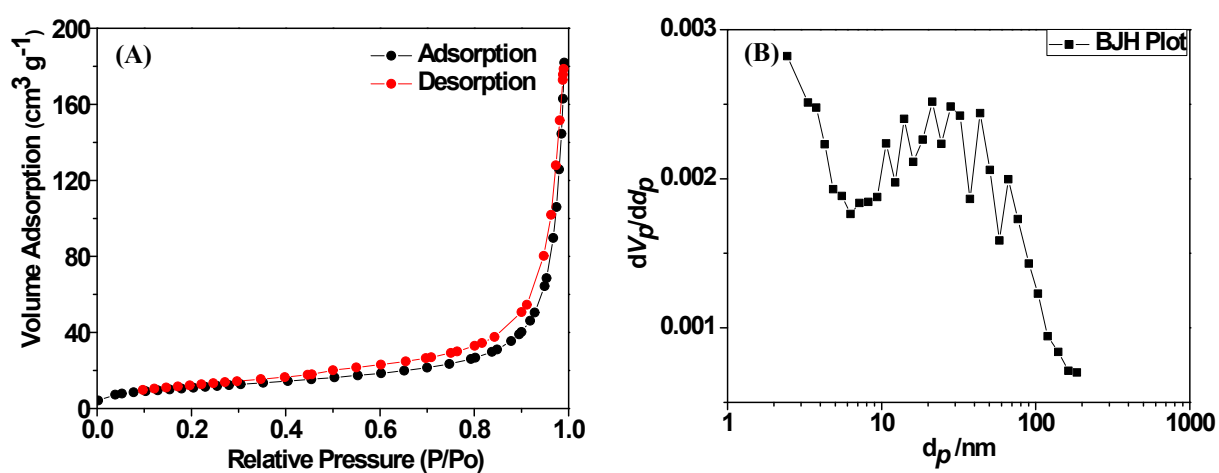

**Fig. S6.** BET surface area profile (A) Adsorption isotherm and (B) pore size distribution for the  $\text{Co}_3\text{V}_2\text{O}_8$  microspheres prepared by the one-pot synthesis.

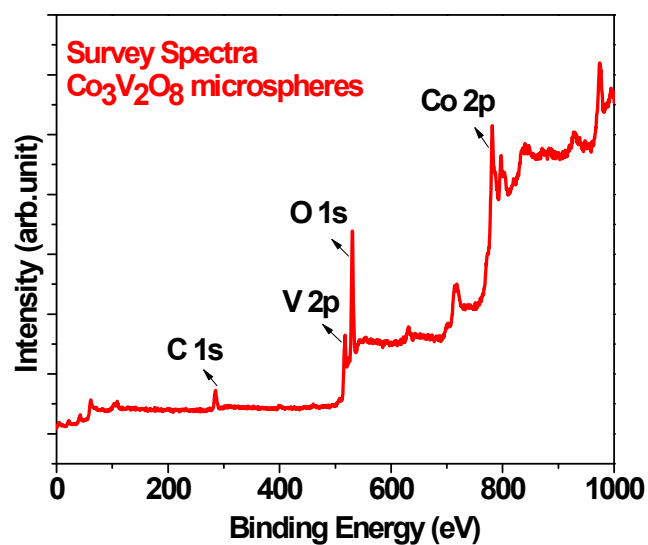

**Fig. S7.** XPS survey spectra for the CVO microspheres prepared in the present study.

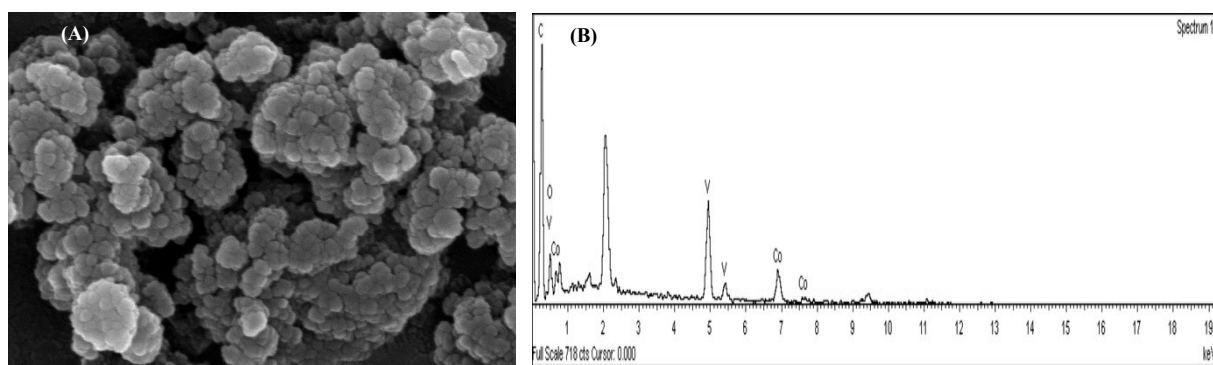

**Fig. S8.** Ex-situ (A) SEM image for CVO-microspheres after 100 discharge/charge cycles at 1 A g<sup>-1</sup> current density for LIBs; (B) corresponding EDS pattern.
